# Supplementary material for: Analysis of Selected Endocrine Disrupters Fraction Including Bisphenols Extracted from Daily Products, Food Packaging and Treated Wastewater Using Optimized Solid-Phase Extraction and Temperature-Dependent Inclusion Chromatography
Source: MDPI journal article supplement (doi:10.3390/molecules24071285), 2019-04-02
Supplement: s1 [file s1]

## Supporting Information

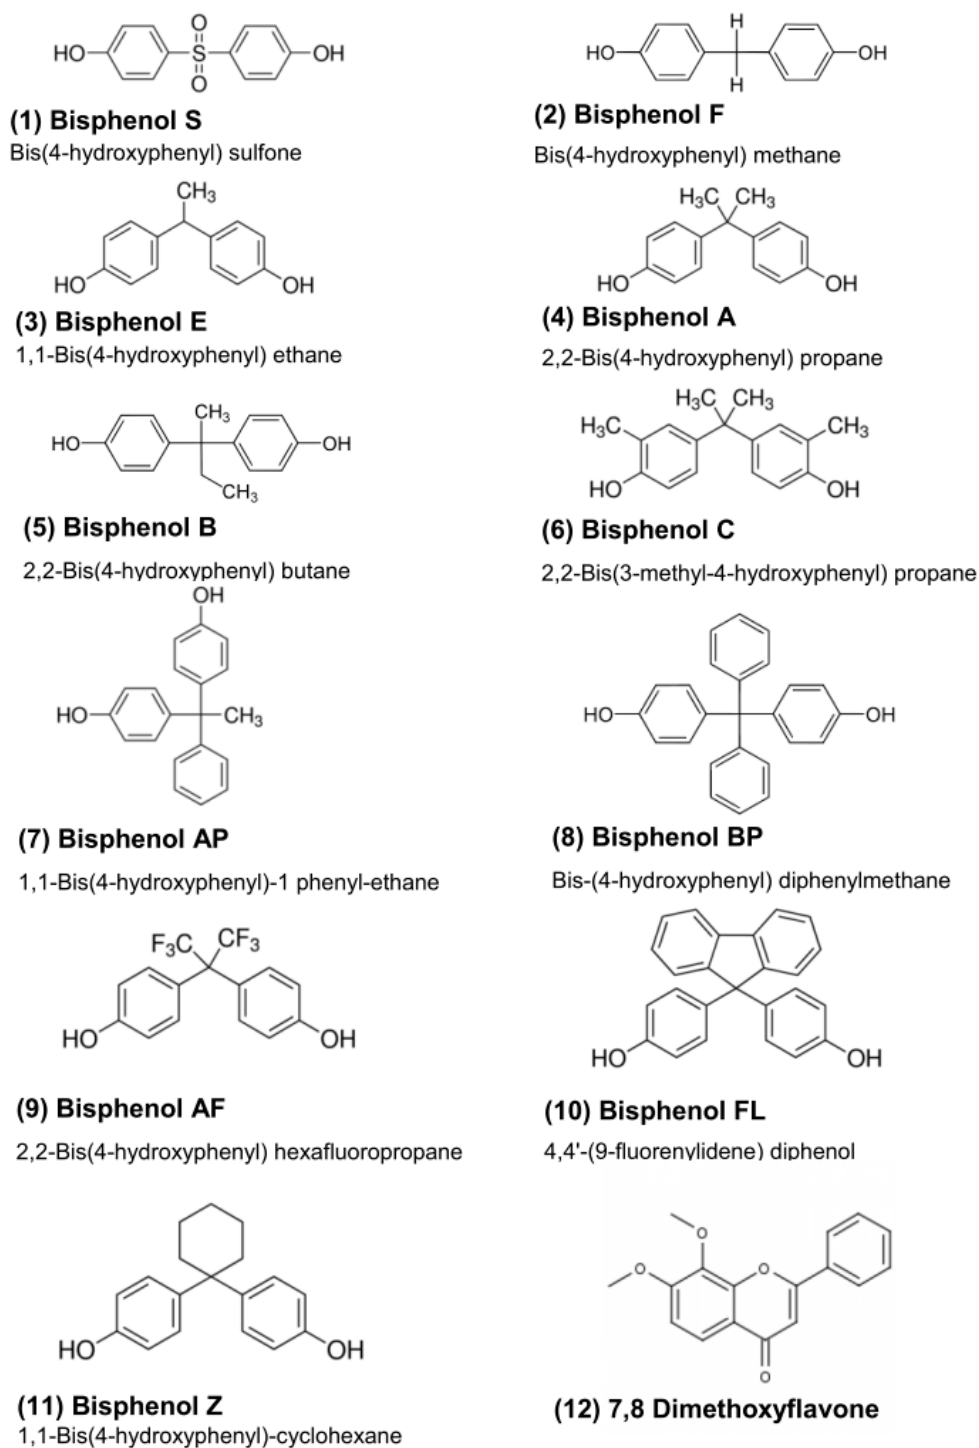

**Figure S1.** Chemical structures of selected bisphenols and internal standard substance (7,8-dimethoxyflavone) for chromatographic analysis of target analytes.

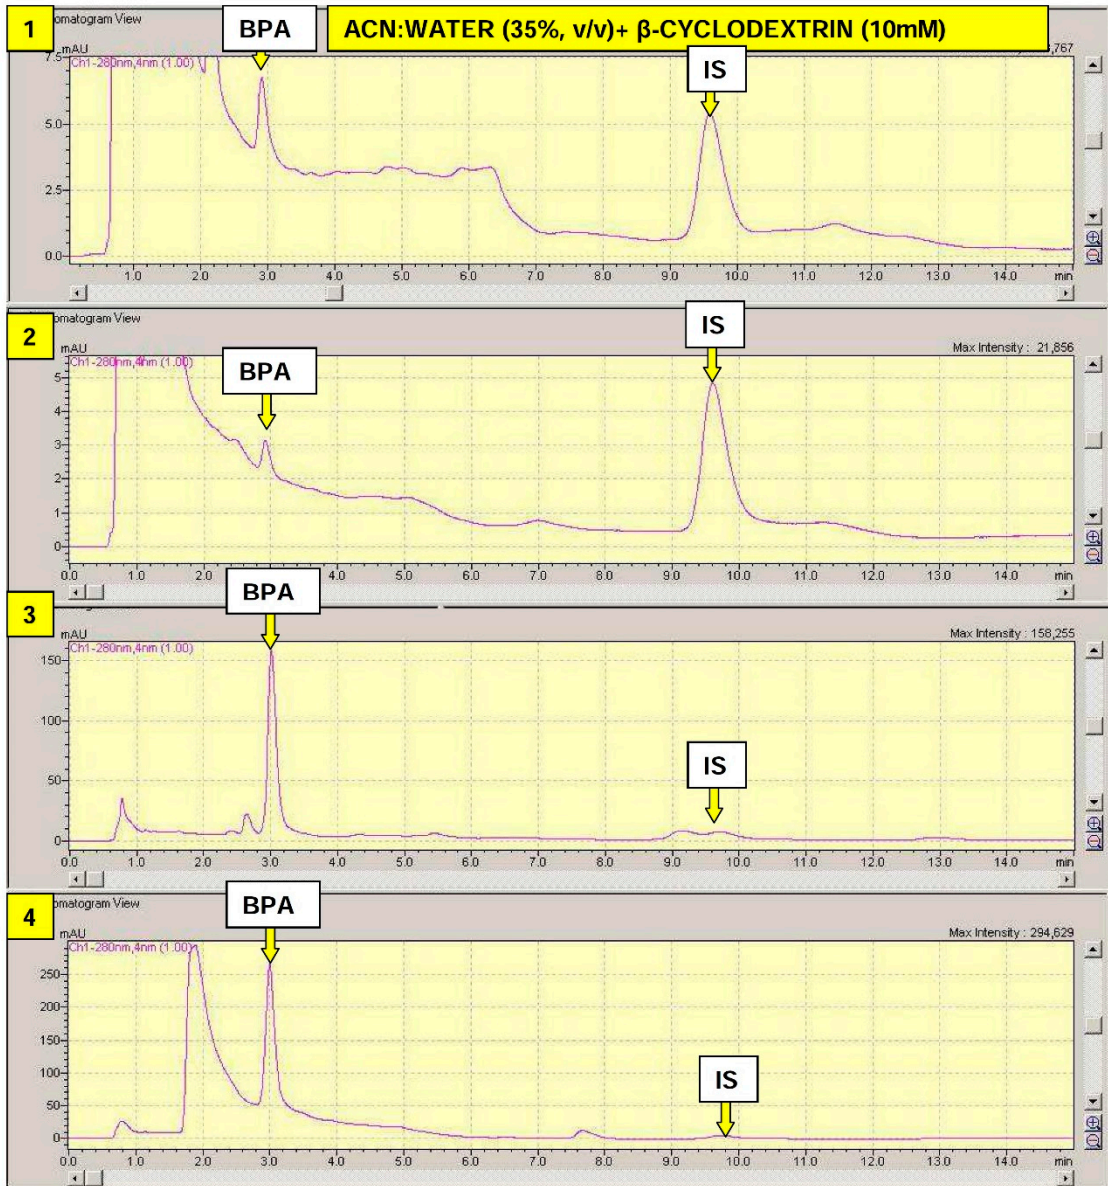

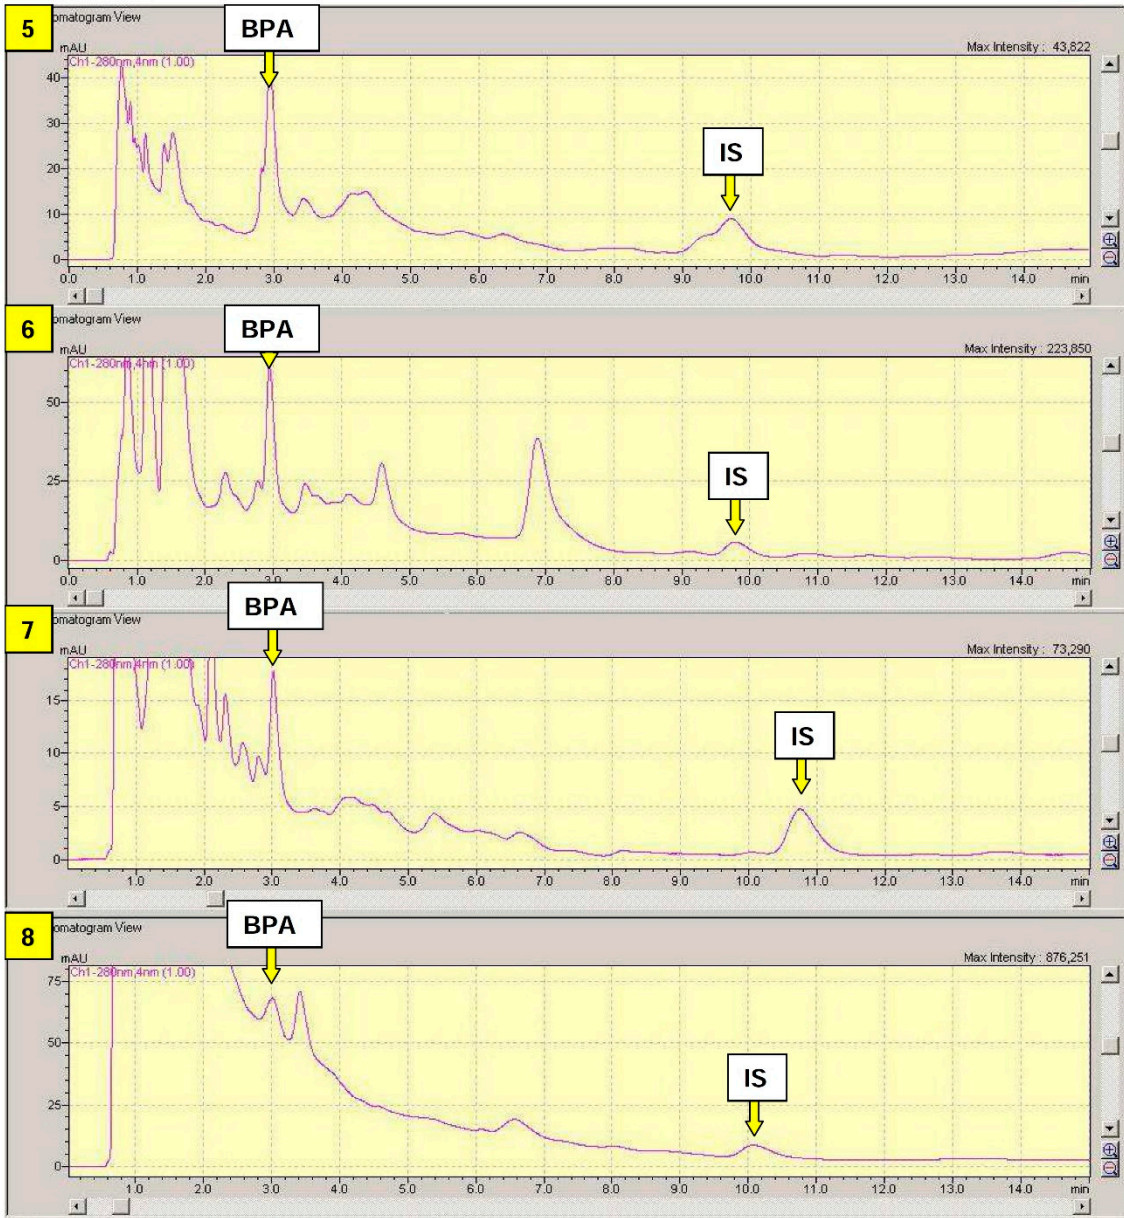

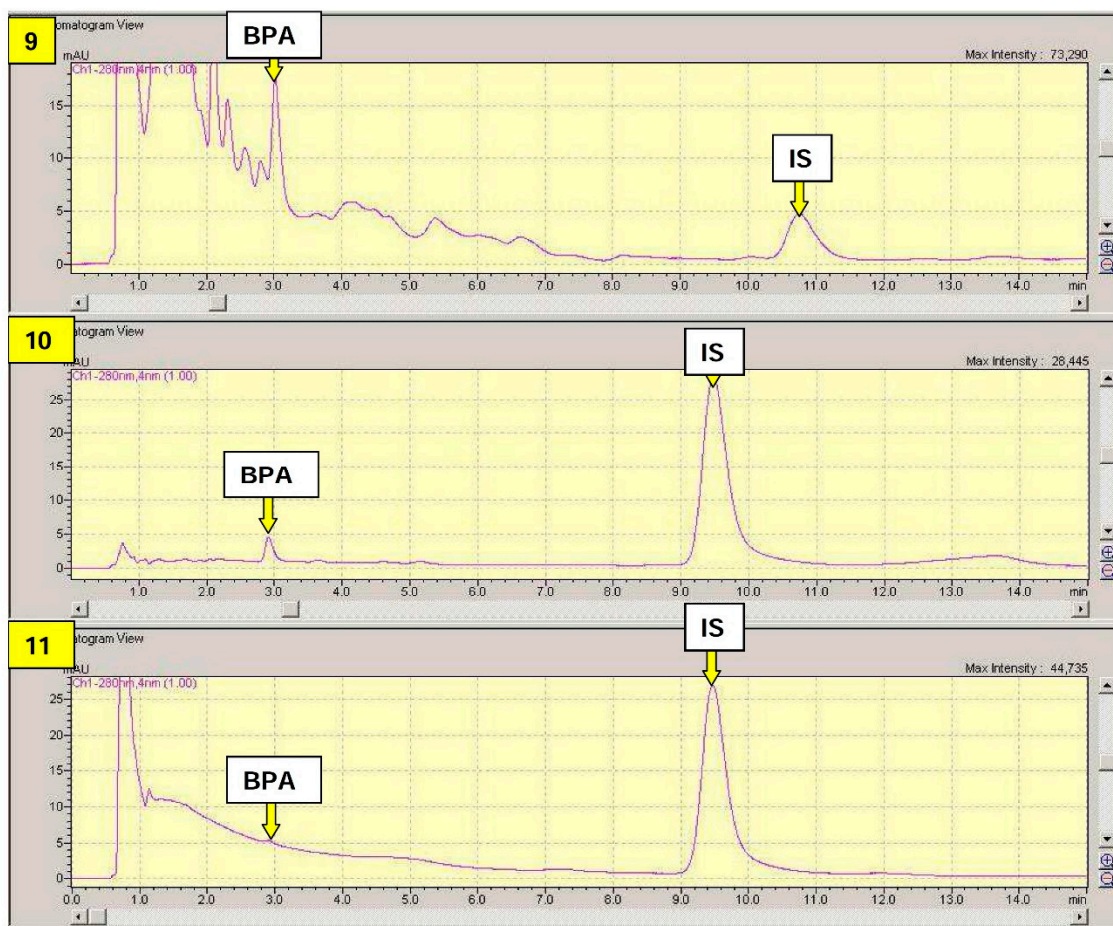

**Figure S2.** HPLC chromatograms of SPE extracts of environmental samples and recorded at analytical wavelength = 280 nm. Sample labels: **1** Boiled tap water and 7,8 dimethoxyflavone (IS), **2** Tap water and rice bags and 7,8 dimethoxyflavone, **3** Tap water and plastic (braeakfast bags) and 7,8 dimethoxftlavone, **4** Tap water and cleaning cloths and 7,8 diethoxyflavone, **5** tap water and fish bait and 7,8 dimethoxyflavone, **6** tap water and sanitary towels and 7,8 dimethoxyflavone, **7** tap water and wet wipes and 7,8 dimethoxyflavone, **8** boiled purified sewage and 7,8 dimethoxyflavone. **9** Raw purified sewage and 7,8 dimethoxyflavone, **10** distilled water and 7,8 dimethoxyflavone, **11** Raw tap water and 7,8 dimethoxyflavone. Bisphenol A (BPA) peak is marked on all chromatograms.

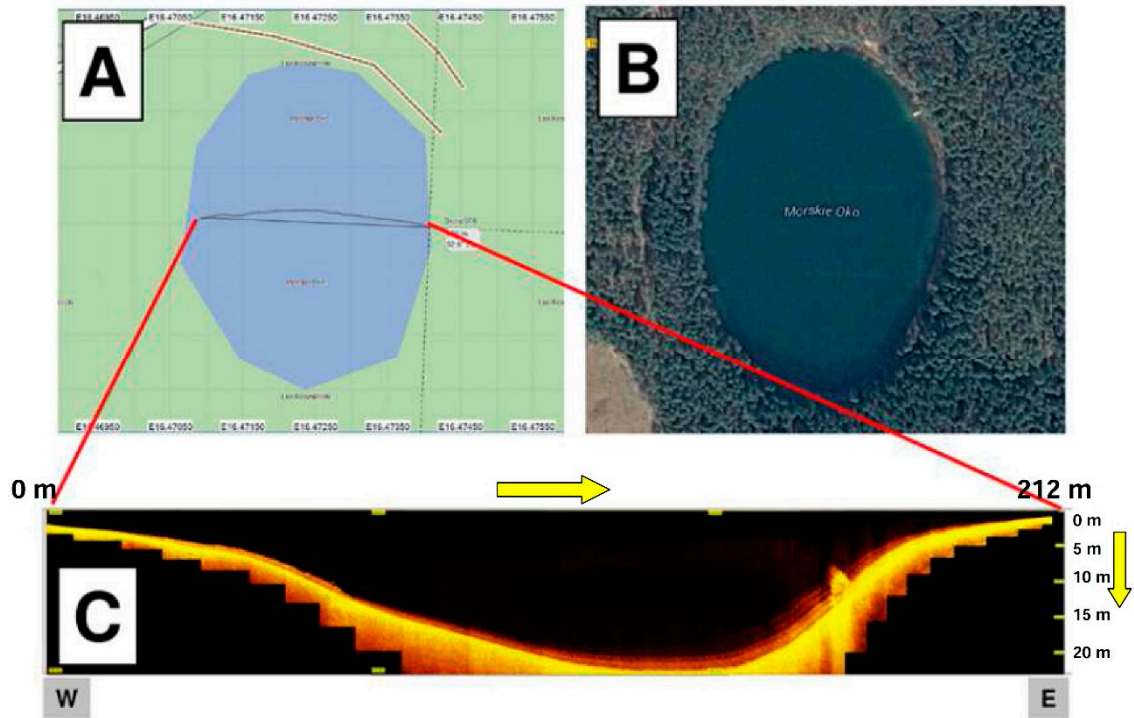

**Figure S3.** Geographical location (A,B maps provided by Garmin and GoogleMaps, respectively) and bathymetric intersection (22.03.2015) through Jezioro Morskie Oko lobelia lake. Depth profile was made using Garmin echoMAP 50dv marine chartplotter/sonar equipped with transducer GT 20 (77/200/455 kHz) working with high frequency 455 kHz (DownVü mode); lake cross-section was visualized using Home Port Ver. 2.2.1.0 2009-2015 Garmin Ltd. freeware; Copyright @ 2015 Paweł K. Zarzycki with permission.
